# Supplementary material
Source: MDPI journal article supplement (https://www.mdpi.com/2073-4344/9/10/872)
Supplement: s1 [file s1]

# Kinetics of Fischer-Tropsch Synthesis in a 3-D Printed Stainless Steel Microreactor Using Different Mesoporous Silica Supported Co-Ru Catalysts

Nafeezuddin Mohammad <sup>1</sup>, Sujoy Bepari <sup>2</sup>, Shyam Aravamudhan <sup>1</sup> and Debasish Kuila <sup>1,2,\*</sup>

<sup>1</sup> Department of Nanoengineering, Joint School of Nanoscience and Nanoengineering, North Carolina A&T State University, Greensboro, NC 27411, USA

<sup>2</sup> Department of Chemistry, North Carolina A&T State University, Greensboro, NC 27411, USA

\* Correspondence: dkuila@ncat.edu; Tel.: +1-336-285-2243

## Supporting Information

### Supporting Figures

**Figure S1.** a) Low and b) High magnification SEM images for CoRu-MCM-41 c) EDX mapping for CoRu-MCM-41

**Figure S2.** Low magnification TEM images of a) CoRu-MCM-41 b) CoRu-KIT-6 c) CoRu-KIT-6

**Figure S3.** XPS spectra of CoRu-S (MCM-41, KIT-6, SBA-15) for a) Si 2p b) O1s

## SEM-EDX

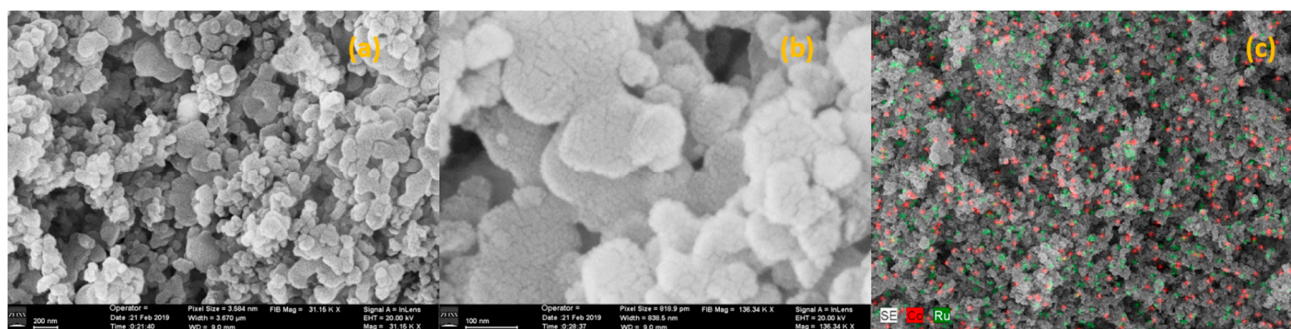

**Figure S1.** a) Low and b) High magnification SEM images for CoRu-MCM-41 c) EDX mapping for CoRu-MCM-41

## TEM

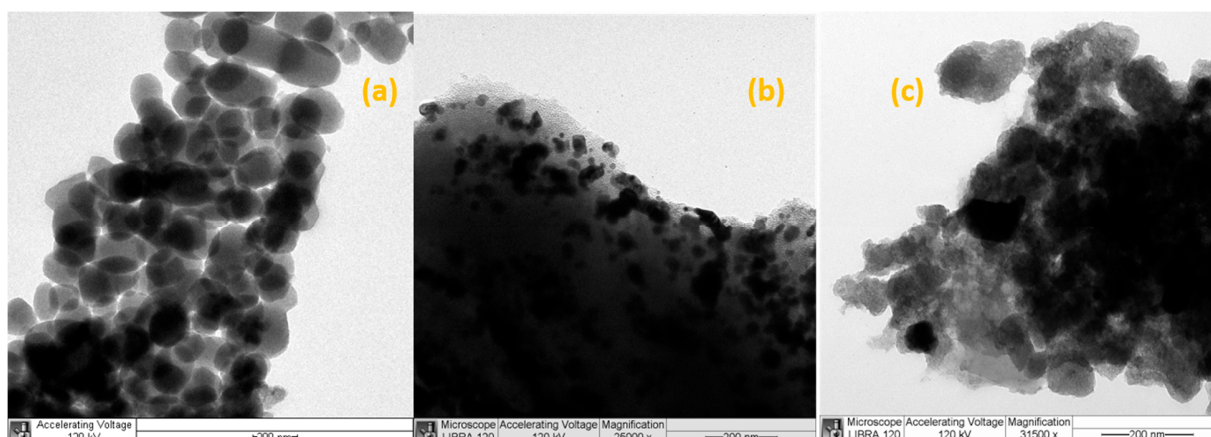

**Figure S2.** Low magnification TEM images of a) CoRu-MCM-41 b) CoRu-KIT-6 c) CoRu-SBA-15

## XPS

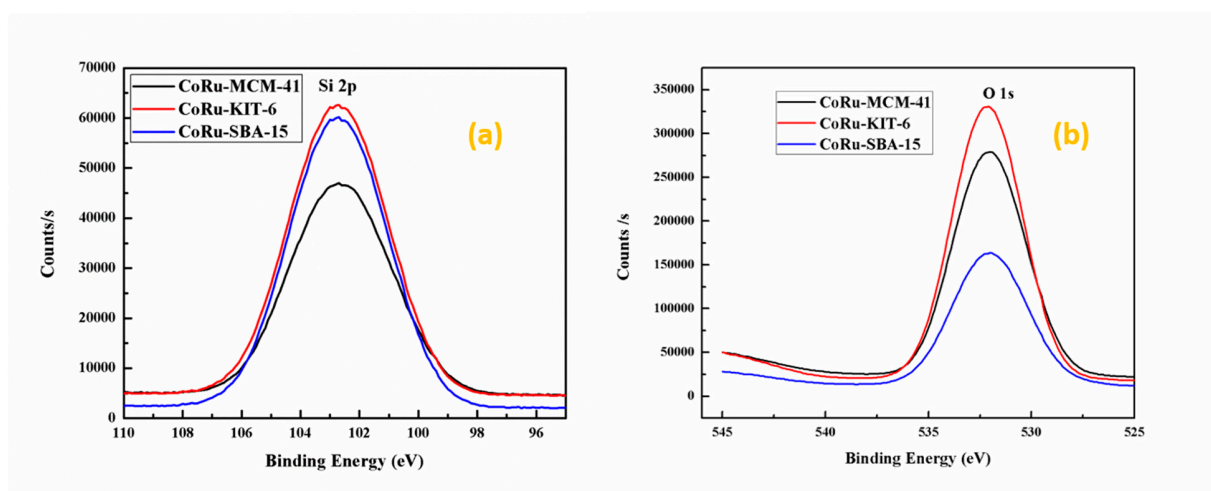

**Figure S3.** XPS spectra of CoRu-S (MCM-41, KIT-6, SBA-15) for a) Si 2p b) O1s
